# Supplementary material for: MiR-202-3p determines embryo viability during mid-blastula transition
Source: Front Cell Dev Biol. 2022 Aug 8;10:897826. doi: 10.3389/fcell.2022.897826 (PMC9393261; doi:10.3389/fcell.2022.897826)
Supplement: Supplementary file 1 [file table2.xlsx]

## Sheet: KEGG pathways
Supplementary Table S2. Genes of different KEGG pathway
ID_dre03010_Ribosome	gene_name	Gene ID	ensemble_ID	Description
	rps2	406565	ENSDARG00000077291	ribosomal protein S2
	rplp0	58101	ENSDARG00000051783	ribosomal protein, large, P0
	rplp1	336719	ENSDARG00000021864	ribosomal protein, large, P1
	faua	393710	ENSDARG00000099022	Finkel-Biskis-Reilly murine sarcoma virus (FBR-MuSV) ubiquitously expressed a
	uba52	641289	ENSDARG00000041435	ubiquitin A-52 residue ribosomal protein fusion product 1
	rplp2	335629	ENSDARG00000101406	ribosomal protein, large P2
	rps26l	393715	ENSDARG00000030408	ribosomal protein S26, like
ID_dre00190_Oxidative phosphorylation	gene_name	Gene ID	ensemble_ID	Description
	atp5mf	402883	ENSDARG00000037867	ATP synthase membrane subunit f
	atp5pd	393675	ENSDARG00000098355	ATP synthase peripheral stalk subunit
	cox7b	563476	ENSDARG00000115557	cytochrome c oxidase subunit 7B
	cox8a	557348	ENSDARG00000095273	cytochrome c oxidase subunit 8A
	ndufs6	447913	ENSDARG00000056583	NADH:ubiquinone oxidoreductase subunit S6
ID_dre04260_Cardiac muscle contraction	gene_name	Gene ID	ensemble_ID	Description
	cox7b	563476	ENSDARG00000115557	cytochrome c oxidase subunit 7B
	cox8a	557348	ENSDARG00000095273	cytochrome c oxidase subunit 8A
ID_dre04217_Necroptosis	gene_name	Gene ID	ensemble_ID	Description
	hsp90aa1.2	565155	ENSDARG00000024746	heat shock protein 90, alpha (cytosolic), class A member 1, tandem duplicate 2
	camk2g2	793359	ENSDARG00000056206	calcium/calmodulin-dependent protein kinase (CaM kinase) II gamma 2
	ppiab	335519	ENSDARG00000103994	peptidylprolyl isomerase Ab (cyclophilin A)
ID_dre00603_Glycosphingolipid biosynthesis - globo and isoglobo series	gene_name	Gene ID	ensemble_ID	Description
	hexb	323613	ENSDARG00000034368	hexosaminidase B (beta polypeptide)
ID_dre04530_Tight junction	gene_name	Gene ID	ensemble_ID	Description
	tuba8l	337223	ENSDARG00000042708	tubulin, alpha 8 like
	jun	335916	ENSDARG00000043531	Jun proto-oncogene, AP-1 transcription factor subunit
	cldne	81584	ENSDARG00000043128	claudin e
	si:ch211-1i11.3	100005496	ENSDARG00000104760	si:ch211-1i11.3
	wu:fd14a01	100008376	ENSDARG00000102414	wu:fd14a01
	myl9b	406493	ENSDARG00000008030	myosin, light chain 9b, regulatory
	cldnb	81581	ENSDARG00000009544	claudin b
	zgc:153713	751630		zgc:153713
	rhoab	100006041	ENSDARG00000094673	ras homolog gene family, member Ab
ID_dre04210_Apoptosis	gene_name	Gene ID	ensemble_ID	Description
	atf4b	556410	ENSDARG00000038141	activating transcription factor 4b
	tuba8l	337223	ENSDARG00000042708	tubulin, alpha 8 like
	jun	335916	ENSDARG00000043531	Jun proto-oncogene, AP-1 transcription factor subunit
	nfkbiaa	406463	ENSDARG00000005481	nuclear factor of kappa light polypeptide gene enhancer in B-cells inhibitor, alpha a
	si:ch211-1i11.3	100005496	ENSDARG00000097356	si:ch211-1i11.3
	atf4a	406514	ENSDARG00000111939	activating transcription factor 4a
	birc2	373107	ENSDARG00000044619	baculoviral IAP repeat containing 2
	map3k14a	100004261	ENSDARG00000074060	mitogen-activated protein kinase kinase kinase 14a
ID_dre04621_NOD-like receptor signaling pathway	gene_name	Gene ID	ensemble_ID	Description
	txnipa	368359	ENSDARG00000036107	thioredoxin interacting protein a
	jun	335916	ENSDARG00000043531	Jun proto-oncogene, AP-1 transcription factor subunit
	nfkbiaa	406463	ENSDARG00000005481	nuclear factor of kappa light polypeptide gene enhancer in B-cells inhibitor, alpha a
	birc2	373107	ENSDARG00000044619	baculoviral IAP repeat containing 2
	zgc:153713	751630		zgc:153713
	rhoab	100006041	ENSDARG00000094673	ras homolog gene family, member Ab
	mavs	562867	ENSDARG00000069733	mitochondrial antiviral signaling protein
ID_dre04510_Focal adhesion	gene_name	Gene ID	ensemble_ID	Description
	jun	335916	ENSDARG00000043531	Jun proto-oncogene, AP-1 transcription factor subunit
	col4a1	554269	ENSDARG00000055009	collagen, type IV, alpha 1
	col6a4a	564005	ENSDARG00000079752	collagen, type VI, alpha 4a
	col6a2	567771	ENSDARG00000061436	collagen, type VI, alpha 2
	myl9b	406493	ENSDARG00000008030	myosin, light chain 9b, regulatory
	birc2	373107	ENSDARG00000044619	baculoviral IAP repeat containing 2
	zgc:153713	751630	ZFIN:ZDB-GENE-060825-41	zgc:153713
	rhoab	100006041	ENSDARG00000094673	ras homolog gene family, member Ab
ID_dre04137_Mitophagy - animal	gene_name	Gene ID	ensemble_ID	Description
	jun	335916	ENSDARG00000043531	Jun proto-oncogene, AP-1 transcription factor subunit
	atf4b	556410	ENSDARG00000038141	activating transcription factor 4b
	atf4a	406514	ENSDARG00000111939	activating transcription factor 4a
	foxo3b	30296	ENSDARG00000042904	forkhead box O3b
ID_dre04622_RIG-I-like receptor signaling pathway	gene_name	Gene ID	ensemble_ID	Description
	nfkbiaa	406463	ENSDARG00000005481	nuclear factor of kappa light polypeptide gene enhancer in B-cells inhibitor, alpha a
	trim25	393144	ENSDARG00000104396	tripartite motif containing 25
	tbkbp1	559568	ENSDARG00000061473	TBK1 binding protein 1
	mavs	562867	ENSDARG00000069733	mitochondrial antiviral signaling protein
ID_dre04010_MAPK signaling pathway	gene_name	Gene ID	ensemble_ID	Description
	jun	335916	ENSDARG00000043531	Jun proto-oncogene, AP-1 transcription factor subunit
	hsp70.1	100126123	ENSDARG00000029688	heat shock cognate 70-kd protein, tandem duplicate 1
	hsp70.3	30671	ENSDARG00000021924	heat shock cognate 70-kd protein, tandem duplicate 3
	atf4b	556410	ENSDARG00000038141	activating transcription factor 4b
	si:ch211-1i11.3	100005496	ENSDARG00000104760	si:ch211-1i11.3
	atf4a	406514	ENSDARG00000111939	activating transcription factor 4a
	map3k14a	100004261	ENSDARG00000074060	mitogen-activated protein kinase kinase kinase 14a
	tgfb3	369195	ENSDARG00000019367	transforming growth factor, beta 3
	igf2a	30710	ENSDARG00000018643	insulin-like growth factor 2a
	arrb2b	394099	ENSDARG00000011545	arrestin, beta 2b
ID_dre04672_Intestinal immune network for IgA production	gene_name	Gene ID	ensemble_ID	Description
	map3k14a	100004261	ENSDARG00000074060	mitogen-activated protein kinase kinase kinase 14a
	cxcl12a	352944	ENSDARG00000037116	chemokine (C-X-C motif) ligand 12a (stromal cell-derived factor 1)
	hexb	323613	ENSDARG00000034368	hexosaminidase B (beta polypeptide)
ID_dre04512_ECM-receptor interaction	gene_name	Gene ID	ensemble_ID	Description
	col4a1	554269	ENSDARG00000055009	collagen, type IV, alpha 1
	col6a4a	564005	ENSDARG00000079752	collagen, type VI, alpha 4a
	col6a2	567771	ENSDARG00000061436	collagen, type VI, alpha 2
ID_dre04216_Ferroptosis	gene_name	Gene ID	ensemble_ID	Description
	slc3a2b	399488	ENSDARG00000037012	solute carrier family 3 member 2b
	acsl1a	555308	ENSDARG00000030514	acyl-CoA synthetase long chain family member 1a
	tfr1a	494477	ENSDARG00000101322	transferrin receptor 1a
ID_dre04141_Protein processing in endoplasmic reticulum	gene_name	Gene ID	ensemble_ID	Description
	hsp70.1	100126123	ENSDARG00000029688	heat shock cognate 70-kd protein, tandem duplicate 1
	hsp70.3	30671	ENSDARG00000021924	heat shock cognate 70-kd protein, tandem duplicate 3
	atf4b	556410	ENSDARG00000038141	activating transcription factor 4b
	si:ch211-1i11.3	100005496	ENSDARG00000104760	si:ch211-1i11.3
	atf4a	406514	ENSDARG00000111939	activating transcription factor 4a
	ckap4	406549	ENSDARG00000032405	cytoskeleton associated protein 4
	nfe2l2a	360149	ENSDARG00000042824	nuclear factor, erythroid 2-like 2a
ID_dre04350_TGF-beta signaling pathway	gene_name	Gene ID	ensemble_ID	Description
	tgfb3	369195	ENSDARG00000019367	transforming growth factor, beta 3
	zgc:153713	751630	ZFIN:ZDB-GENE-060825-41	zgc:153713
	rhoab	100006041	ENSDARG00000094673	ras homolog gene family, member Ab
	smad7	326282	ENSDARG00000016858	SMAD family member 7
ID_dre04060_Cytokine-cytokine receptor interaction	gene_name	Gene ID	ensemble_ID	Description
	cxcl12a	352944	ENSDARG00000037116	chemokine (C-X-C motif) ligand 12a (stromal cell-derived factor 1)
	tgfb3	369195	ENSDARG00000019367	transforming growth factor, beta 3
	il20ra	556728	ENSDARG00000032571	interleukin 20 receptor, alpha
ID_dre04260_Cardiac muscle contraction	gene_name	Gene ID	ensemble_ID	Description
	cox7b	563476	ENSDARG00000115557	cytochrome c oxidase subunit 7B
	cox8a	557348	ENSDARG00000095273	cytochrome c oxidase subunit 8A
ID_dre00601_Glycosphingolipid biosynthesis - lacto and neolacto series	gene_name	Gene ID	ensemble_ID	Description
	zgc:194330	798349	ENSDARG00000061432	zgc:194330
ID_dre00790_Folate biosynthesis	gene_name	Gene ID	ensemble_ID	Description
	tph1b	415103	ENSDARG00000036082	tryptophan hydroxylase 1b
ID_dre00380_Tryptophan metabolism	gene_name	Gene ID	ensemble_ID	Description
	tph1b	415103	ENSDARG00000036082	tryptophan hydroxylase 1b
